# Supplementary material for: Accuracy and Reliability of Internet Resources for Information on Monoclonal Gammopathy of Undetermined Significance—What Information Is out There for Our Patients?
Source: MDPI journal article supplement (doi:10.3390/cancers13184508), 2021-09-07
Supplement: s1 [file s1]

Table S3: Characterization of websites by search engine.

| Search engine                               | Google     | Bing       | Yahoo      | P value            |
|---------------------------------------------|------------|------------|------------|--------------------|
| Websites, n                                 | 53         | 66         | 59         |                    |
| Website category, n (%)                     |            |            |            |                    |
| Scientific/governmental                     | 24 (45.3)  | 30 (45.5)  | 29 (49.2)  | 0.096 <sup>a</sup> |
| Foundation/advocacy                         | 15 (28.3)  | 27 (40.9)  | 25 (42.4)  |                    |
| News/media                                  | 12 (22.6)  | 5 (7.6)    | 3 (5.1)    |                    |
| Industry/for profit                         | 2 (3.8)    | 2 (3.0)    | 2 (3.4)    |                    |
| Personal commentary/blog                    | 0 (0.0)    | 2 (3.0)    | 0 (0.0)    |                    |
| Host continent, n (%)                       |            |            |            |                    |
| Europe                                      | 7 (13.2)   | 7 (10.6)   | 7 (11.9)   | 0.937 <sup>b</sup> |
| North America                               | 43 (81.1)  | 53 (80.3)  | 47 (79.7)  |                    |
| South America                               | 1 (1.9)    | 0 (0.0)    | 0 (0.0)    |                    |
| Asia                                        | 0 (0.0)    | 1 (1.5)    | 0 (0.0)    |                    |
| Australia                                   | 2 (3.8)    | 3 (4.5)    | 3 (5.1)    |                    |
| Africa                                      | 0 (0.0)    | 0 (0.0)    | 0 (0.0)    |                    |
| Antarctica                                  | 0 (0.0)    | 0 (0.0)    | 0 (0.0)    |                    |
| Not assessable                              | 0 (0.0)    | 2 (3.0)    | 2 (3.4)    |                    |
| HON foundation certificate                  |            |            |            |                    |
| Assessable, n (%)                           | 53 (100)   | 66 (100)   | 59 (100)   | 0.741              |
| Not assessable, n (%)                       | 0 (0.0)    | 0 (0.0)    | 0 (0.0)    |                    |
| Valid certificate, n (%)                    | 4 (7.6)    | 7 (10.6)   | 7 (11.9)   |                    |
| JAMA score                                  |            |            |            |                    |
| Assessable, n (%)                           | 53 (100)   | 66 (100)   | 59 (100)   | 0.846              |
| Not assessable, n (%)                       | 0 (0.0)    | 0 (0.0)    | 0 (0.0)    |                    |
| Median (range)                              | 3 (1-4)    | 3 (0-4)    | 3 (0-4)    |                    |
| Flesch Reading Ease score                   |            |            |            |                    |
| Assessable, n (%)                           | 50 (94.3)  | 58 (87.9)  | 52 (88.1)  | 0.889              |
| Not assessable, n (%)                       | 3 (5.7)    | 8 (12.1)   | 7 (11.9)   |                    |
| Mean (SD)                                   | 48 (9)     | 48 (10)    | 47 (9)     |                    |
| Flesch Kincaid Grade level                  |            |            |            |                    |
| Assessable, n (%)                           | 44 (83.0)  | 53 (80.3)  | 50 (84.8)  | 0.853              |
| Not assessable, n (%)                       | 9 (17.0)   | 13 (19.7)  | 9 (15.3)   |                    |
| Mean (SD)                                   | 12 (2)     | 11 (3)     | 12 (2)     |                    |
| Sum DISCERN score                           |            |            |            |                    |
| Assessable, n (%)                           | 52 (98.1)  | 62 (93.9)  | 56 (94.9)  | 0.204              |
| Not assessable, n (%)                       | 1 (1.9)    | 4 (6.1)    | 3 (5.1)    |                    |
| All websites, median (range)                | 29 (20-43) | 28 (16-43) | 29 (16-43) |                    |
| Top 10 website hits, median (range)         | 31 (23-43) | 32 (20-38) | 33 (23-38) | 0.837              |
| Sum key fact score                          |            |            |            |                    |
| Assessable, n (%)                           | 53 (100)   | 66 (100)   | 59 (100)   | 0.773              |
| Not assessable, n (%)                       | 0 (0.0)    | 0 (0.0)    | 0 (0.0)    |                    |
| All websites, median (range)                | 16 (4-37)  | 14 (3-37)  | 13 (3-37)  |                    |
| Top 10 website hits, median (range)         | 13 (9-31)  | 14 (6-37)  | 19 (6-37)  | 0.771              |
| Misleading/wrong facts                      |            |            |            |                    |
| Websites with misleading/wrong facts, n (%) | 3 (5.7)    | 8 (12.1)   | 8 (13.6)   | 0.357              |
| Overall identified wrong facts, n           | 11         | 35         | 35         |                    |

<sup>a</sup> Scientific/governmental versus foundation/advocacy organizations versus other.

<sup>b</sup> Europe versus North America.

HON, Health on the Net; JAMA, Journal of the American Medical Association; SD, standard deviation.
