# Supplementary material for: Accuracy and Reliability of Internet Resources for Information on Monoclonal Gammopathy of Undetermined Significance—What Information Is out There for Our Patients?
Source: MDPI journal article supplement (doi:10.3390/cancers13184508), 2021-09-07
Supplement: s1 [file s1]

**Table S4: DISCERN score for websites and videos.**

| Health information source                                                                                            | A. Websites |  | B. Videos |
|----------------------------------------------------------------------------------------------------------------------|-------------|--|-----------|
| Overall unique websites/videos, n (%)                                                                                | 86 (100)    |  | 61 (100)  |
| Assessable, n (%)                                                                                                    | 84 (97.8)   |  | 61 (100)  |
| Not assessable, n (%)                                                                                                | 2 (2.3)     |  | 0 (0.0)   |
| <b>Section 1: Is the publication reliable? (item 1-8), median (range)</b>                                            |             |  |           |
| Explicit aims                                                                                                        | 2 (1-4)     |  | 2 (1-4)   |
| Aims achieved                                                                                                        | 2 (2-5)     |  | 3 (1-4)   |
| Relevance to patients                                                                                                | 3 (2-5)     |  | 3 (2-4)   |
| Sources of information                                                                                               | 2 (1-5)     |  | 1 (1-4)   |
| Currency (date) of information                                                                                       | 2 (1-5)     |  | 1 (1-4)   |
| Bias and balance                                                                                                     | 2 (1-5)     |  | 1 (1-4)   |
| Additional sources of information                                                                                    | 1 (1-4)     |  | 1 (1-2)   |
| Reference to areas of uncertainty                                                                                    | 1 (1-3)     |  | 1 (1-3)   |
| Overall section 1                                                                                                    | 14 (8-27)   |  | 14 (8-22) |
| <b>Section 2: How good is the quality of information on treatment/follow-up choices? (item 9-15), median (range)</b> |             |  |           |
| Significance of MGUS diagnosis                                                                                       | 2 (1-4)     |  | 2 (1-4)   |
| Benefits of follow-up                                                                                                | 1 (1-4)     |  | 1 (1-3)   |
| Disadvantages of follow-up                                                                                           | 1 (1-1)     |  | 1 (1-2)   |
| Risks of no follow-up                                                                                                | 1 (1-2)     |  | 1 (1-2)   |
| Uncertainty associated with follow-ups                                                                               | 1 (1-5)     |  | 1 (1-4)   |
| Variation of follow-up intervals                                                                                     | 1 (1-2)     |  | 1 (1-3)   |
| Shared decision making                                                                                               | 1 (1-5)     |  | 1 (1-2)   |
| Overall section 2                                                                                                    | 9 (7-16)    |  | 9 (7-14)  |
| <b>Section 3: Overall rating of the publication (item 16), median (range)</b>                                        |             |  |           |
| Overall quality                                                                                                      | 3 (1-4)     |  | 2 (1-3)   |

The categorial item scoring of the DISCERN score ranges between 1 (not addressed/fulfilled) and 5 (fully addressed/fulfilled). MGUS, monoclonal gammopathy of undetermined significance.
