# Supplementary material for: Accuracy and Reliability of Internet Resources for Information on Monoclonal Gammopathy of Undetermined Significance—What Information Is out There for Our Patients?
Source: MDPI journal article supplement (doi:10.3390/cancers13184508), 2021-09-07
Supplement: s1 [file s1]

**Table S1: Scores, measures and certificates used for the evaluation of websites and videos.**

[illegible]

|                                               |                                                                                                                                                                              |                                                                                                                                                                                      |                                                                    |                                                                                                     |                                                                                             |                                                                              |                                                                                                                                                  |
|-----------------------------------------------|------------------------------------------------------------------------------------------------------------------------------------------------------------------------------|--------------------------------------------------------------------------------------------------------------------------------------------------------------------------------------|--------------------------------------------------------------------|-----------------------------------------------------------------------------------------------------|---------------------------------------------------------------------------------------------|------------------------------------------------------------------------------|--------------------------------------------------------------------------------------------------------------------------------------------------|
| <b>Flesch Reading Ease score<sup>5</sup></b>  | Measure of readability. Evaluates how difficult it is to understand a text.                                                                                                  | /                                                                                                                                                                                    | /                                                                  | Score = 206.835 - (1.015 x average sentence length) - (84.6 x average number of syllables per word) | Metric (interval)                                                                           | No theoretical lower bound<br><br>121.22 as highest (easiest) possible score | 0-30: very difficult<br>30-50: difficult<br>50-60: fairly difficult<br>60-70: standard<br>70-80: fairly easy<br>80-90: easy<br>90-100: very easy |
| <b>Flesch Kincaid Grade level<sup>6</sup></b> | Measure of readability. Uses a modified Flesch Reading Ease formula to produce a grade-level score. Evaluates which standard US school grade is needed to understand a text. | /                                                                                                                                                                                    | /                                                                  | Level = (0.39 x average sentence length) + (11.8 x average number of syllables per word) - 15.59    | Metric (interval)                                                                           | -3.4 as the lowest grade level score in theory<br><br>no upper bound         | >12: higher education level<br>≤12: grade level score corresponding to standard US school grades, in which 12 is the final year of high school.  |
| 4. Entity related content                     |                                                                                                                                                                              |                                                                                                                                                                                      |                                                                    |                                                                                                     |                                                                                             |                                                                              |                                                                                                                                                  |
| <b>Key fact score</b>                         | Evaluation of the video content according to key facts described in established clinical guidelines.                                                                         | 50 items addressing the categories: definition, symptoms, risk factors, evaluation, management, outcome, and risk of progression. For specific items, compare Supplementary Table 2. | 1: fully addressed<br>0.5: partially addressed<br>0: not addressed | Per item                                                                                            | Absolute number (%) of evaluated videos fully/partially/not addressing the respective item. | /                                                                            | /                                                                                                                                                |
|                                               |                                                                                                                                                                              |                                                                                                                                                                                      |                                                                    | Sum of scores for each of the 50 items.                                                             | Categorical (ordinal)                                                                       | 0-50                                                                         | /                                                                                                                                                |
| 5. Video related parameters                   |                                                                                                                                                                              |                                                                                                                                                                                      |                                                                    |                                                                                                     |                                                                                             |                                                                              |                                                                                                                                                  |
| <b>Viewing rate</b>                           | Evaluates how often the video has been watched since upload.                                                                                                                 | /                                                                                                                                                                                    | /                                                                  | views / days since upload                                                                           | Metric (ratio)                                                                              | /                                                                            | /                                                                                                                                                |
| <b>Engagement rate</b>                        | Evaluates the rate of engagement (likes, dislikes, comments) since upload.                                                                                                   | /                                                                                                                                                                                    | /                                                                  | (likes + dislikes + comments) / views                                                               | Metric (ratio)                                                                              | /                                                                            | /                                                                                                                                                |

HON, Health on the Net; JAMA, Journal of the American Medical Association; MGUS, monoclonal gammopathy of undetermined significance.

1. Boyer C, Selby M, Appel RD. The Health On the Net Code of Conduct for medical and health web sites. *Stud Health Technol Inform* 1998; **52 Pt 2**: 1163-1166. e-pub ahead of print 1999/06/29;
2. Organisation H-N-G. Health On the Net. In, 2020.
3. Silberg WM, Lundberg GD, Musacchio RA. Assessing, controlling, and assuring the quality of medical information on the Internet: Caveant lector et viewor--Let the reader and viewer beware. *JAMA* 1997; **277**(15): 1244-1245. e-pub ahead of print 1997/04/16;
4. Charnock D, Shepperd S, Needham G, Gann R. DISCERN: an instrument for judging the quality of written consumer health information on treatment choices. *J Epidemiol Community Health* 1999; **53**(2): 105-111. e-pub ahead of print 1999/07/09; doi: 10.1136/jech.53.2.105
5. Flesch R. A new readability yardstick. *J Appl Psychol* 1948; **32**(3): 221-233. e-pub ahead of print 1948/06/01; doi: 10.1037/h0057532
6. Kincaid JP, Fishburne RP, Rogers RL, Chissom BS. Derivation of new readability formulas (automated readability index, fog count, and flesch reading ease formula) for Navy enlisted personnel. *Chief of Naval Technical Training: Naval Air Station Memphis*. 1975; (Research Branch Report 8-75. ).
