# Supplementary material for: Accuracy and Reliability of Internet Resources for Information on Monoclonal Gammopathy of Undetermined Significance—What Information Is out There for Our Patients?
Source: MDPI journal article supplement (doi:10.3390/cancers13184508), 2021-09-07
Supplement: s1 [file s1]

**Table S2: Website and video content evaluation by MGUS key facts.**

| Category            | Item                                  | Description                                                                                                                                                                             |
|---------------------|---------------------------------------|-----------------------------------------------------------------------------------------------------------------------------------------------------------------------------------------|
| <b>Definition</b>   | IgM MGUS                              | Serum IgM M protein < 30 g/L, BM lymphoplasmacytic infiltration < 10 %, no symptoms or end-organ damage that can be attributed to the lymphoproliferative disorder.                     |
|                     | Non-IgM MGUS                          | Serum M protein (non-IgM type) < 30 g/L, clonal BM PCs < 10 %, absence of end-organ damage.                                                                                             |
|                     | Light-chain MGUS                      | Abnormal FLC ratio, increased level of the involved LC, no heavy chain expression on immunofixation, absence of end-organ damage, clonal BM PCs <10 %, urinary M protein < 500 mg/24 h. |
|                     | BM PCs < 10 %                         | self-explanatory                                                                                                                                                                        |
|                     | M protein < 30 g/L                    | self-explanatory                                                                                                                                                                        |
|                     | No end organ damage                   | No evidence of CRAB criteria, i.e. hypercalcemia, renal insufficiency, anemia, bone lesions.                                                                                            |
|                     | No SLiM criteria                      | SLiM criteria: clonal BM PCs < sixty percent, involved:uninvolved serum FLC ratio < 100, ≤ 1 focal lesions on MRI studies.                                                              |
|                     | Diagnosis of exclusion                | No diagnostic criteria of other hemato-oncological entities met.                                                                                                                        |
| <b>Symptoms</b>     | None                                  | No evidence of symptoms that can be attributed to MGUS.                                                                                                                                 |
|                     | Incidental finding                    | MGUS is often diagnosed incidentally.                                                                                                                                                   |
| <b>Risk factors</b> | Age                                   | Incidence increases with age.                                                                                                                                                           |
|                     | Male                                  | Slightly higher incidence in men compared to women.                                                                                                                                     |
|                     | First degree relative                 | Increased risk in case of first-degree relatives diagnosed with MGUS.                                                                                                                   |
| <b>Evaluation</b>   | Medical history                       | Mandatory to obtain any relevant information on patient's health status.                                                                                                                |
|                     | Clinical examination                  | Mandatory to assess any signs or symptoms of a medical condition.                                                                                                                       |
|                     | Differential blood count              | Differentiation of white blood cells.                                                                                                                                                   |
|                     | Electrolytes                          | Sodium, potassium, calcium etc.                                                                                                                                                         |
|                     | Kidney retention parameters           | Creatinine, glomerular filtration rate, urea.                                                                                                                                           |
|                     | Total protein, albumin (S)            | Quantity of total protein and albumin in serum.                                                                                                                                         |
|                     | Protein electrophoresis (S)           | Separates the serum protein components into five major fractions. Examines which globulin fraction is elevated.                                                                         |
|                     | Immunofixation (S)                    | Assessment of the M protein type in serum.                                                                                                                                              |
|                     | Immunofixation (U)                    | Assessment of the M protein type in urine.                                                                                                                                              |
|                     | Ig (S)                                | Concentration of IgG, IgA, IgM in serum.                                                                                                                                                |
|                     | FLCs (S)                              | Concentration of FLCs (kappa and lambda) in serum.                                                                                                                                      |
|                     | 24 h urine for protein quantification | Quantifies the urinary protein excretion per 24 h.                                                                                                                                      |
|                     | LDH                                   | Non-specific marker of cell turnover.                                                                                                                                                   |
|                     | NT-proBNP                             | Normal level helps to rule out chronic heart failure (particularly relevant in case of AL amyloidosis).                                                                                 |
|                     | ALAT                                  | Evaluation of liver function.                                                                                                                                                           |
|                     | Beta-2-microglobulin (S)              | (Prognostic) marker in PC disorders, particularly MM.                                                                                                                                   |
|                     | Low dose whole body CT                | Detection of osteolyses and osteopenia, without contrast agents.                                                                                                                        |
|                     | Radiography not a standard            | Projection radiography is no longer standard of diagnostics in PC disorders.                                                                                                            |
|                     | MRI                                   | Evaluation of diffuse BM infiltration, focal bone lesions and extramedullary manifestations.                                                                                            |
|                     | BM cytology                           | Assessment of extent of PC infiltration and status of other hematopoietic cells.                                                                                                        |
|                     | BM histology                          | Assessment of extent of PC infiltration and status of other hematopoietic cells in the context of BM stroma.                                                                            |
|                     | BM cytogenetics/FISH                  | Detection of chromosomal aberrations.                                                                                                                                                   |
| <b>Management</b>   | No treatment indication               | No treatment indication is given when MGUS diagnosis is established and differential diagnoses or organ damage are excluded.                                                            |
|                     | Continuous follow-up                  | Continuous follow-up is mandatory to detect disease progression or organ damage and initiate treatment.                                                                                 |
|                     | Risk factors guided follow-up         | Follow-up intervals might be defined in dependency of presence/absence of risk factors.                                                                                                 |

|                            |                              |                                                                                                                                                                |
|----------------------------|------------------------------|----------------------------------------------------------------------------------------------------------------------------------------------------------------|
| <b>Outcome</b>             | Precancerous condition       | MGUS can progress into a hemato-oncological disorder and end organ damage might develop, i.e. smoldering MM, MM, B-NHL, MGRS, neuropathy, AL amyloidosis.      |
|                            | Smoldering MM                | Serum M protein $\geq 30$ g/L or urinary M protein $\geq 500$ mg/24 h or BM PCs $\geq 10$ -60 %, absence of MM defining events or AL amyloidosis.              |
|                            | MM                           | Clonal BM PCs $\geq 10\%$ or biopsy proven plasmacytoma and at least one of the CRAB or SLiM criteria.                                                         |
|                            | B-NHL                        | Particularly in case of IgM-MGUS is B-NHL the underlying disease that might require treatment in case of progression.                                          |
|                            | MGRS                         | Monoclonal gammopathy with unclear renal insufficiency or significant proteinuria. Criteria of multiple myeloma or other lymphoproliferative diseases not met. |
|                            | Neuropathy                   | Deposits of non-functional M protein at peripheral nerves can cause neuropathy.                                                                                |
|                            | AL amyloidosis               | Deposits of non-functional M protein can affect nearly every organ and cause severe organ damage.                                                              |
| <b>Risk of progression</b> | LR MGUS                      | Serum M protein $< 15$ g/L, normal FLC ratio.                                                                                                                  |
|                            | IR/HR MGUS                   | All other than LR MGUS.                                                                                                                                        |
|                            | Progression rate LR MGUS     | Approximately 5 % in 20 years.                                                                                                                                 |
|                            | Progression rate IR/HR MGUS  | 20-60 % in 20 years.                                                                                                                                           |
|                            | Per year MM progression rate | The risk to develop a MM or another lymphoproliferative disorder is approximately 1 % per year.                                                                |

MGUS key facts were sourced from Blood guideline "How I manage monoclonal gammopathy of undetermined significance", International Myeloma Working Group updated criteria for the diagnosis of multiple myeloma [and MGUS]. and Deutsche Gesellschaft für Hämatologie und Medizinische Onkologie e. V. (DGHO) on MGUS.<sup>1-3</sup>

AL-amyloidosis, light chain-amyloidosis; ALAT, alanine aminotransferase; BM, bone marrow; B-NHL, B-cell non-Hodgkin lymphoma; CT, computer tomography; FLC, free light chain; FISH, fluorescence in-situ hybridization; HR, high-risk; Ig, immunoglobulin; IR, intermediate-risk; LC, light chain; LDH, lactate dehydrogenase; LR, low-risk; MGRS, monoclonal gammopathy of renal significance; MGUS, monoclonal gammopathy of undetermined significance; MM, multiple myeloma; M protein, monoclonal protein; MRI, magnetic resonance imaging; NT-proBNP, N-terminal pro b-type natriuretic peptide; PC, plasma cell; S, serum; U, urine.

1. Go RS, Rajkumar SV. How I manage monoclonal gammopathy of undetermined significance. *Blood* 2018; **131**(2): 163-173. e-pub ahead of print 2017/12/01; doi: 10.1182/blood-2017-09-807560
2. Rajkumar SV, Dimopoulos MA, Palumbo A, Blade J, Merlini G, Mateos MV *et al.* International Myeloma Working Group updated criteria for the diagnosis of multiple myeloma. *Lancet Oncol* 2014; **15**(12): e538-548. doi: 10.1016/S1470-2045(14)70442-5
3. Scheid C, Driessen C, Knop S, Krauth MT, Naumann R, Schieferdecker A *et al.* Monoklonale Gammopathie unklarer Signifikanz (MGUS). In: DGHO, 2019.
